# Supplementary material for: Evaluation of Keratinized Tissue Augmentation Using Amnion/Chorion Allograft vs. Autogenous Connective Tissue in Implant Therapy: A Retrospective Study
Source: Research Square preprint supplement (doi:10.21203/rs.3.rs-4887714/v1), 2024-10-08
Supplement: Supplementary file 1 [file ac47f3f99e1e440f0d6e4d4d.docx]

Title : **Evaluation of Keratinized Tissue Augmentation Using Amnion/Chorion Allograft vs. Autogenous Connective Tissue in Implant Therapy: A Retrospective Study**

Nicola De Angelis1,2*, Paolo Pesce1*, Zethy Hanum Kassim2, Catherine Yumang3, Domenico Baldi1, Maria Menini1

* NDA and PP equally contributed to the study

1 Department of Surgical Sciences and Integrated Diagnostics – Unit of Implant and Prosthetic Dentistry, University of Genoa, Italy

2 Dental Faculty- Department of Restorative Dentistry, University of Technology MARA Sungai Buloh, Malaysia

3 Private Practice , Acqui Terme (AL), Italy

Corresponding Author : Paolo Pesce Largo R. Benzi 10 16121 Genova email paolo.pesce@unige.it
